# Supplementary material for: The Association of Adolescent Internalizing and Externalizing Behavior Problems and Prospective Self with Alcohol and Marijuana Use
Source: Preprints.org preprint supplement (doi:10.20944/preprints202408.0823.v1), 2024-08-12
Supplement: Supplementary file 1 [file supplementary]

**Section 1**

*Description of the Sample and Sample Recruitment*

Participants are from the Adolescent Health Risk Behavior (AHRB) study, a study designed to characterize behavioral and cognitive correlates of adolescents’ health risk behavior trajectories. AHRB consists of a nonprobability sample of 10th and 12th grade students recruited from nine public school districts across eight Southeastern Michigan counties, using a quota sampling approach to increase socioeconomic, racial and ethnic diversity. Recruitment of participants was conducted at the school and/or school district level, using a quota sampling approach. Specifically, schools were recruited to maximize sample diversity on socioeconomic status (SES) and race/ethnicity, with replacements sought for schools that declined participation (almost always for internal scheduling reasons). The recruitment strategy was intended to approximate the demographic characteristics of the population in Michigan, whereby 81% identified as White, 15.2% as Black or African American, and 5.1% as Hispanic or Latino (of any race) in the 2019 American Community Survey [1] .

A total of 5009 eligible participants took a consent form home that required active parental consent to participate, and 2278 (45.8%) students returned the parental consent forms to their schools. The vast majority of those simply did not return the forms; parents rarely declined participation. Of those 2278 who provided parental consent, 2017 (88.5%) students participated in this study (non-participation was due primarily to absence on the day of in-school assessments).

**Section 2**

*Motivation behind weighting methods*

We constructed weights and calibrated the AHRB sample to adjust for potential bias due

to the non-probability sampling design. First, AHRB’s recruiting technique of quota sampling of students could introduce selection bias due to voluntary participation [2]. To adjust for potential bias incurred by the nonprobability sampling, we used the method of raking, i.e., iterative proportional fitting, and generated a weight for each sample unit to balance the sample distribution with the target population distribution for a given set of variables. For this study, we utilized the 2015 one-year American Community Survey (ACS) public use microdata sample (PUMS) for calibration, since the first wave of the AHRB data was collected in 2015.

*Raking adjustment*

Targeting to represent U.S. adolescents between 15- and 19-year-old, we used the

weighted ACS-PUMS data for 15–19-year-old to approximate the population distribution and calculated post-stratification weights for the AHRB sample. We iteratively matched four demographic characteristics between ACS with AHRB: Sex, Race and ethnicity, Household size, and parental employment status. Below, we described the data preprocessing details.

*Sex*: male and female.

*Race and Ethnicity*: Small groups with race categories of “Native Hawaiian or Other Pacific Islander alone,” “American Indian and Alaskan Native alone,” and “unknown or not reported” were grouped together (*n* = 32 out of 2017 cases). In ACS, this combined category also included the group with “Some Other Race Alone” available in ACS but not in AHRB does not have.

*Household Size*: In AHRB, 5 out of the 2017 cases have missing values for this variable. To avoid data deletion, random values were drawn from the sample pool of the remaining 2012 cases with replacement and assigned to those five cases.

*Parent Employment*: Because ACS does not collect parental employment for individuals 18- year-old or older, the weighting process created a new level for parent employment called “18 year old or older” for both ACS and AHRB data to keep the levels from the two datasets the same.

The process of raking was carried out using the *survey* package in R [3]. To avoid extreme weights, we trimmed the weight by assigning weights smaller than 2% quantile of the weights with the weight value at the second quantile. Similarly, weights larger than 98% quantile of the weights were assigned with the weight value at the 98th quantile.

In summary, we constructed based weights for W1 participants to adjust for sample selection bias. The distribution of the overall weight is shown in *Figure S1*.

*Figure S1*. Distribution of the overall weights
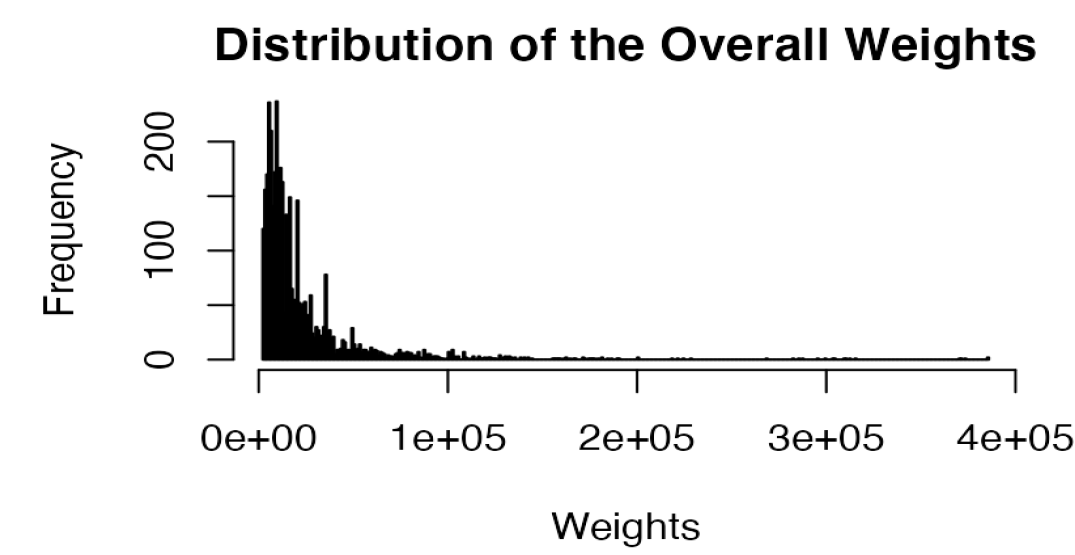


References

1. Bureau, U.C. 2019 Available online: https://www.census.gov/programs-surveys/acs/news/updates/2019.html (accessed on 31 July 2024).
2. Elliott, M.R.; Valliant, R. Inference for Nonprobability Samples. Statistical Science 2017, 32, 249–264, doi:10.1214/16-STS598.
3. Lumley, T. Survey: Analysis of Complex Survey Samples; 2021. Available online: http://r-survey.r-forge.r-project.org/survey/ (accessed on 31 July 2024).

**Section 3**

**Table S1**

*Unweighted Sociodemographic Characteristics of Participants (N=2,017)*

| Demographic Information |  |
| --- | --- |
| Age, M (SD) | 16.8 (1.1) |
| Sex, n (%) female | 1110 (55.0) |
| Race/Ethnicity, n (%) |  |
| Black or African American non-Hispanic | 452 (22.4) |
| White non-Hispanic | 1103 (54.7) |
| Hispanic all races | 161 (8.0) |
| Other | 88 (4.4) |
| More than one race non-Hispanic | 213 (10.6) |
| Current level of education, n (%) |  |
| 10th grade | 985 (48.8) |
| 12th grade | 1032 (51.2) |
| Average Level Parent Education, n (%) |  |
| Completed less than grade school | 12 (0.62) |
| Some high school | 117 (6.0) |
| Completed high school | 362 (18.6) |
| Some college | 569 (29.2) |
| Completing college | 560 (28.7) |
| Graduate or professional school after college | 330 (16.9) |

**Table S2**

*Multi-Level Models: Associations Between Internalizing Problems, Externalizing Problems, and Prospective Self (IV) and 12-Month Alcohol Use (Unweighted)*

| Predictors | Model 1 | | | Model 2 | | | Model 3 | | |
| --- | --- | --- | --- | --- | --- | --- | --- | --- | --- |
| *b SE p* | | | *b SE p* | | | *b SE p* | | |
| 12-Month Self-Reported Alcohol Use |  |  |  |  |  |  |  |  |  |
| Intercept | 0.75 | 0.10 | <0.001 | 0.69 | 0.10 | <0.001 | 0.70 | 0.10 | <0.001 |
| Sex (ref=female) |  |  |  |  |  |  |  |  |  |
| Male | −0.13 | 0.07 | 0.06 | −0.18 | 0.07 | 0.01 | −0.19 | 0.07 | 0.009 |
| Subject Grade (ref=10th grade) |  |  |  |  |  |  |  |  |  |
| 12th grade | 0.83 | 0.07 | <0.001 | 0.80 | 0.07 | <0.001 | 0.80 | 0.07 | <0.001 |
| Race/Ethnicity (ref=White non-Hispanic) |  |  |  |  |  |  |  |  |  |
| Black or African American non-Hispanic | −0.51 | 0.10 | <0.001 | −0.53 | 0.10 | <0.001 | −0.53 | 0.10 | <0.001 |
| Hispanic all races | −0.16 | 0.14 | 0.26 | −0.18 | 0.14 | 0.20 | −0.18 | 0.14 | 0.20 |
| Other | −0.48 | 0.19 | 0.01 | −0.43 | 0.18 | 0.02 | −0.43 | 0.18 | 0.02 |
| More than one race non-Hispanic | −0.29 | 0.12 | 0.03 | −0.32 | 0.12 | 0.006 | −0.32 | 0.12 | 0.006 |
| Average Parent Education (ref=graduate school or professional school after college) |  |  |  |  |  |  |  |  |  |
| Completed grade school or less | 0.21 | 0.50 | 0.66 | 0.04 | 0.48 | 0.93 | 0.04 | 0.48 | 0.93 |
| Some high school | 0.20 | 0.17 | 0.26 | 0.16 | 0.17 | 0.34 | 0.16 | 0.17 | 0.35 |
| Completed high school | 0.11 | 0.12 | 0.36 | 0.05 | 0.12 | 0.70 | 0.04 | 0.12 | 0.71 |
| Some college | 0.20 | 0.12 | 0.06 | 0.21 | 0.10 | 0.05 | 0.21 | 0.10 | 0.05 |
| Completed college | 0.18 | 0.11 | 0.10 | 0.19 | 0.10 | 0.07 | 0.18 | 0.10 | 0.07 |
| Externalizing Behavior Problems (ref=WNL) |  |  |  |  |  |  |  |  |  |
| Borderline clinical range |  |  |  | 1.13 | 0.15 | <0.001 | 1.15 | 0.13 | <0.001 |
| Clinical range |  |  |  | 1.57 | 0.18 | <0.001 | 1.58 | 0.24 | <0.001 |
| Internalizing Behavior Problems (ref=WNL) |  |  |  |  |  |  |  |  |  |
| Borderline clinical range |  |  |  | −0.07 | 0.13 | 0.59 | −0.07 | 0.13 | 0.58 |
| Clinical range |  |  |  | −0.20 | 0.12 | 0.11 | −0.19 | 0.13 | 0.13 |
| Prospective Self |  |  |  | −0.59 | 0.19 | 0.001 | −0.64 | 0.21 | 0.002 |
| Externalizing Behavior*Prospective Self |  |  |  |  |  |  |  |  |  |
| Borderline clinical range |  |  |  |  |  |  | 0.23 | 0.71 | 0.75 |
| Clinical range |  |  |  |  |  |  | 0.03 | 0.85 | 0.97 |
| Internalizing Behavior*Prospective Self |  |  |  |  |  |  |  |  |  |
| Borderline clinical range |  |  |  |  |  |  | 0. 06 | 0.72 | 0.93 |
| Clinical range |  |  |  |  |  |  | 0.19 | 0.60 | 0.75 |

ASEBA Youth Self-Report Survey

Ref = reference category; WNL = within normal levels

**Table S3**

*Multi-Level Models: Associations Between Internalizing Problems, Externalizing Problems, and Prospective Self (IV) and 12-Month Marijuana Use (Unweighted)*

| Predictors | Model 1 | | | Model 2 | | | Model 3 | | |
| --- | --- | --- | --- | --- | --- | --- | --- | --- | --- |
| *b SE p* | | | *b SE p* | | | *b SE p* | | |
| 12-Month Self-Reported Marijuana Use |  |  |  |  |  |  |  |  |  |
| Intercept | 0.26 | 0.12 | 0.03 | 0.20 | 0.12 | 0.09 | 0.22 | 0.12 | 0.07 |
| Sex (ref=female) |  |  |  |  |  |  |  |  |  |
| Male | 0.20 | 0.09 | 0.02 | 0.16 | 0.08 | 0.06 | 0.14 | 0.08 | 0.09 |
| Subject Grade (ref=10th grade) |  |  |  |  |  |  |  |  |  |
| 12th grade | 0.62 | 0.12 | <0.001 | 0.59 | 0.08 | <0.001 | 0.58 | 0.08 | <0.001 |
| Race/Ethnicity (ref=White non-Hispanic) |  |  |  |  |  |  |  |  |  |
| Black or African American non-Hispanic | −0.15 | 0.12 | 0.21 | −0.17 | 0.11 | 0.14 | −0.16 | 0.11 | 0.14 |
| Hispanic all races | 0.32 | 0.18 | 0.07 | 0.31 | 0.17 | 0.06 | 0.34 | 0.17 | 0.04 |
| Other | −0.58 | 0.22 | 0.009 | −0.51 | 0.21 | 0.02 | −0.52 | 0.21 | 0.01 |
| More than one race non-Hispanic | 0.20 | 0.15 | 0.18 | 0.16 | 0.14 | 0.27 | 0.13 | 0.14 | 0.34 |
| Average Parent Education (ref=graduate school or professional school after college) |  |  |  |  |  |  |  |  |  |
| Completed grade school or less | −0.44 | 0.65 | 0.51 | −0.56 | 0.61 | 0.36 | −0.64 | 0.61 | 0.30 |
| Some high school | 0.64 | 0.22 | 0.003 | 0.62 | 0.21 | 0.003 | 0.62 | 0.21 | 0.003 |
| Completed high school | 0.36 | 0.15 | 0.01 | 0.28 | 0.14 | 0.04 | 0.26 | 0.14 | 0.06 |
| Some college | 0.12 | 0.13 | 0.37 | 0.13 | 0.12 | 0.30 | 0.12 | 0.12 | 0.35 |
| Completed college | 0.04 | 0.13 | 0.77 | 0.05 | 0.12 | 0.66 | 0.05 | 0.12 | 0.69 |
| Externalizing Behavior Problems (ref=WNL) |  |  |  |  |  |  |  |  |  |
| Borderline clinical range |  |  |  | 1.45 | 0.18 | <0.001 | 1.42 | 0.20 | <0.001 |
| Clinical range |  |  |  | 2.40 | 0.24 | <0.001 | 2.41 | 0.32 | <0.001 |
| Internalizing Behavior Problems (ref=WNL) |  |  |  |  |  |  |  |  |  |
| Borderline clinical range |  |  |  | −0.18 | 0.16 | 0.24 | −0.22 | 0.16 | 0.17 |
| Clinical range |  |  |  | −0.28 | 0.15 | 0.06 | −0.23 | 0.15 | 0.12 |
| Prospective Self |  |  |  | −0.80 | 0.22 | <0.001 | −0.89 | 0.25 | <0.001 |
| Externalizing Behavior*Prospective Self |  |  |  |  |  |  |  |  |  |
| Borderline clinical range |  |  |  |  |  |  | −0.62 | 0.96 | 0.52 |
| Clinical range |  |  |  |  |  |  | −0.59 | 1.11 | 0.60 |
| Internalizing Behavior*Prospective Self |  |  |  |  |  |  |  |  |  |
| Borderline clinical range |  |  |  |  |  |  | −0.61 | 0.89 | 0.47 |
| Clinical range |  |  |  |  |  |  | 1.60 | 0.72 | 0.03 |

ASEBA Youth Self-Report Survey

Ref = reference category; WNL = within normal levels

**Table S4**

*Multi-Level Models: Associations Between t-Score Internalizing Problems, Externalizing Problems, and Prospective Self (IV) and 12-Month Alcohol Use*

| Predictors | Model 1 | | | Model 2 | | | Model 3 | | |
| --- | --- | --- | --- | --- | --- | --- | --- | --- | --- |
| *b SE p* | | | *b SE p* | | | *b SE p* | | |
| 12-Month Self-Reported Alcohol Use |  |  |  |  |  |  |  |  |  |
| Intercept | 0.75 | 0.10 | <0.001 | −1.64 | 0.21 | <0.001 | −1.64 | 0.21 | <0.001 |
| Sex (ref=female) |  |  |  |  |  |  |  |  |  |
| Male | −0.13 | 0.07 | 0.06 | −0.20 | 0.07 | 0.003 | −0.19 | 0.07 | 0.004 |
| Subject Grade (ref=10th grade) |  |  |  |  |  |  |  |  |  |
| 12th grade | 0.83 | 0.07 | <0.001 | 0.74 | 0.07 | <0.001 | 0.74 | 0.07 | <0.001 |
| Race/Ethnicity (ref=White non-Hispanic) |  |  |  |  |  |  |  |  |  |
| Black or African American non-Hispanic | −0.51 | 0.10 | <0.001 | −0.55 | 0.09 | <0.001 | −0.55 | 0.09 | <0.001 |
| Hispanic all races | −0.16 | 0.14 | 0.26 | −0.18 | 0.13 | 0.18 | −0.18 | 0.13 | 0.16 |
| Other | −0.48 | 0.19 | 0.01 | −0.39 | 0.17 | 0.02 | −0.39 | 0.17 | 0.02 |
| More than one race non-Hispanic | −0.29 | 0.12 | 0.03 | −0.42 | 0.11 | <0.001 | −0.41 | 0.11 | <0.001 |
| Average Parent Education (ref=graduate school or professional school after college) |  |  |  |  |  |  |  |  |  |
| Completed grade school or less | 0.21 | 0.50 | 0.66 | 0.20 | 0.44 | 0.65 | 0.21 | 0.44 | 0.63 |
| Some high school | 0.20 | 0.17 | 0.26 | 0.13 | 0.16 | 0.43 | 0.13 | 0.16 | 0.41 |
| Completed high school | 0.11 | 0.12 | 0.36 | 0.04 | 0.11 | 0.73 | 0.04 | 0.11 | 0.71 |
| Some college | 0.20 | 0.12 | 0.06 | 0.12 | 0.10 | 0.21 | 0.12 | 0.10 | 0.22 |
| Completed college | 0.18 | 0.11 | 0.10 | 0.18 | 0.10 | 0.06 | 0.18 | 0.10 | 0.06 |
| Externalizing Behavior Problems |  |  |  | 0.08 | 0.00 | <0.001 | 0.08 | 0.00 | <0.001 |
| Internalizing Behavior Problems |  |  |  | −0.03 | 0.00 | <0.001 | −0.03 | 0.00 | <0.001 |
| Prospective Self |  |  |  | 0.08 | 0.18 | 0.67 | 1.08 | 0.18 | 0.21 |
| Externalizing Behavior*Prospective Self |  |  |  |  |  |  | −0.02 | 0.012 | 0.31 |
| Internalizing Behavior*Prospective Self |  |  |  |  |  |  | 0.00 | 0.02 | 0.99 |

ASEBA Youth Self-Report Survey

Ref = reference category

**Table S5**

*Multi-Level Models: Associations Between t-Score Internalizing Problems, Externalizing Problems, and Prospective Self (IV) and 12-Month Marijuana Use*

| Predictors | Model 1 | | | Model 2 | | | Model 3 | | |
| --- | --- | --- | --- | --- | --- | --- | --- | --- | --- |
| *b SE p* | | | *b SE p* | | | *b SE p* | | |
| 12-Month Self-Reported Marijuana Use |  |  |  |  |  |  |  |  |  |
| Intercept | 0.26 | 0.12 | 0.03 | −2.30 | 0.26 | <0.001 | −2.30 | 0.26 | <0.001 |
| Sex (ref=female) |  |  |  |  |  |  |  |  |  |
| Male | 0.20 | 0.09 | 0.02 | 0.15 | 0.08 | 0.06 | 0.16 | 0.08 | 0.045 |
| Subject Grade (ref=10th grade) |  |  |  |  |  |  |  |  |  |
| 12th grade | 0.62 | 0.09 | <0.001 | 0.55 | 0.08 | <0.001 | 0.56 | 0.08 | <0.001 |
| Race/Ethnicity (ref=White non-Hispanic) |  |  |  |  |  |  |  |  |  |
| Black or African American non-Hispanic | −0.15 | 0.12 | 0.21 | −0.16 | 0.11 | 0.15 | −0.15 | 0.11 | 0.15 |
| Hispanic all races | 0.32 | 0.18 | 0.07 | 0.36 | 0.16 | 0.03 | 0.34 | 0.16 | 0.04 |
| Other | −0.58 | 0.22 | 0.009 | −0.50 | 0.20 | 0.01 | −0.52 | 0.20 | 0.01 |
| More than one race non-Hispanic | 0.20 | 0.15 | 0.18 | 0.10 | 0.14 | 0.45 | 0.11 | 0.14 | 0.40 |
| Average Parent Education (ref=graduate school or professional school after college) |  |  |  |  |  |  |  |  |  |
| Completed grade school or less | −0.44 | 0.65 | 0.51 | −0.43 | 0.60 | 0.47 | −0.39 | 0.59 | 0.51 |
| Some high school | 0.64 | 0.22 | 0.003 | 0.55 | 0.20 | 0.007 | 0.57 | 0.20 | 0.01 |
| Completed high school | 0.36 | 0.15 | 0.01 | 0.25 | 0.14 | 0.07 | 0.25 | 0.14 | 0.06 |
| Some college | 0.12 | 0.13 | 0.37 | 0.05 | 0.12 | 0.69 | 0.04 | 0.12 | 0.74 |
| Completed college | 0.04 | 0.13 | 0.77 | 0.05 | 0.12 | 0.71 | 0.04 | 0.12 | 0.73 |
| Externalizing Behavior Problems |  |  |  | 0.08 | 0.01 | <0.001 | 0.08 | 0.01 | <0.001 |
| Internalizing Behavior Problems |  |  |  | −0.02 | 0.00 | <0.001 | −0.02 | 0.00 | <0.001 |
| Prospective Self |  |  |  | −0.29 | 0.22 | 0.19 | 3.05 | 1.07 | 0.004 |
| Externalizing Behavior*Prospective Self |  |  |  |  |  |  | −0.09 | 0.02 | <0.001 |
| Internalizing Behavior*Prospective Self |  |  |  |  |  |  | 0.03 | 0.02 | 0.18 |

ASEBA Youth Self-Report Survey

Ref = reference category

**Table S6**

*Associations Between Internalizing Problems, Externalizing Problems, and Prospective Self (IV) with Internalizing and Externalizing Interaction and 12-Month Alcohol Use (unweighted vs. weighted)*

| Predictors | Unweighted Model | | | Weighted Model | | |
| --- | --- | --- | --- | --- | --- | --- |
| *b SE p* | | | *b SE p* | | |
| 12-Month Self-Reported Alcohol Use |  |  |  |  |  |  |
| Intercept | 0.68 | 0.10 | <0.001 | 0.89 | 0.11 | <0.001 |
| Sex (ref=female) |  |  |  |  |  |  |
| Male | −0.18 | 0.07 | 0.009 | −0.28 | 0.08 | 0.001 |
| Subject Grade (ref=10th grade) |  |  |  |  |  |  |
| 12th grade | 0.81 | 0.07 | <0.001 | 0.73 | 0.08 | <0.001 |
| Race/Ethnicity (ref=White non-Hispanic) |  |  |  |  |  |  |
| Black or African American non-Hispanic | −0.51 | 0.10 | <0.001 | −0.56 | 0.09 | <0.001 |
| Hispanic all races | −0.17 | 0.14 | 0.21 | −0.29 | 0.13 | 0.03 |
| Other | −0.42 | 0.18 | 0.02 | −0.57 | 0.16 | 0.001 |
| More than one race non-Hispanic | −0.29 | 0.11 | 0.01 | −0.31 | 0.13 | 0.02 |
| Average Parent Education (ref=graduate school or professional school after college) |  |  |  |  |  |  |
| Completed grade school or less | 0.15 | 0.47 | 0.75 | 0.20 | 0.49 | 0.68 |
| Some high school | 0.16 | 0.17 | 0.34 | 0.17 | 0.24 | 0.48 |
| Completed high school | 0.05 | 0.12 | 0.68 | −0.04 | 0.13 | 0.76 |
| Some college | 0.22 | 0.10 | 0.04 | 0.14 | 0.12 | 0.26 |
| Completed college | 0.20 | 0.10 | 0.06 | 0.12 | 0.12 | 0.33 |
| Externalizing Behavior Problems |  |  |  |  |  |  |
| Borderline clinical range | 1.08 | 0.19 | <0.001 | 1.22 | 0.27 | <0.001 |
| Clinical range | 1.64 | 0.28 | <0.001 | 1.96 | 0.32 | <0.001 |
| Internalizing Behavior Problems |  |  |  |  |  |  |
| Borderline clinical range | −0.12 | 0.15 | 0.39 | −0.19 | 0.15 | 0.22 |
| Clinical range | −0.15 | 0.14 | 0.29 | −0.29 | 0.13 | 0.03 |
| Prospective Self | −0.62 | 0.19 | 0.001 | −0.74 | 0.22 | 0.001 |
| Externalizing Behavior*Internalizing Behavior |  |  |  |  |  |  |
| Borderline clinical range* Borderline clinical range | −0.65 | 0.43 | 0.13 | −0.45 | 0.62 | 0.47 |
| Borderline clinical range*Clinical Range | 0.41 | 0.34 | 0.22 | 0.51 | 0.48 | 0.29 |
| Clinical range* Borderline clinical range | 0.99 | 0.47 | 0.03 | 0.82 | 0.44 | 0.06 |
| Clinical range*Clinical range | −0.80 | 0.41 | 0.05 | −0.72 | 0.47 | 0.13 |

ASEBA Youth Self-Report Survey

Ref = reference category

**Table S7**

*Associations Between Internalizing Problems, Externalizing Problems, and Prospective Self (IV) with Internalizing and Externalizing Interaction and 12-Month Marijuana Use (unweighted vs. weighted)*

| Predictors | Unweighted Model | | | Weighted Model | | |
| --- | --- | --- | --- | --- | --- | --- |
| *b SE p* | | | *b SE p* | | |
| 12-Month Self-Reported Marijuana Use |  |  |  |  |  |  |
| Intercept | 0.18 | 0.11 | 0.13 | 0.27 | 0.13 | 0.04 |
| Sex (ref=female) |  |  |  |  |  |  |
| Male | 0.16 | 0.82 | 0.05 | 0.05 | 0.11 | 0.64 |
| Subject Grade (ref=10th grade) |  |  |  |  |  |  |
| 12th grade | 0.58 | 0.08 | <0.001 | 0.59 | 0.11 | <0.001 |
| Race/Ethnicity (ref=White non-Hispanic) |  |  |  |  |  |  |
| Black or African American non-Hispanic | −0.12 | 0.11 | 0.26 | −0.10 | 0.12 | 0.40 |
| Hispanic all races | 0.31 | 0.17 | 0.06 | 0.31 | 0.23 | 0.17 |
| Other | −0.48 | 0.21 | 0.02 | −0.56 | 0.11 | 0.00 |
| More than one race non-Hispanic | 0.18 | 0.14 | 0.18 | 0.18 | 0.19 | 0.35 |
| Average Parent Education (ref=graduate school or professional school after college) |  |  |  |  |  |  |
| Completed grade school or less | −0.36 | 0.61 | 0.56 | −0.59 | 0.61 | 0.56 |
| Some high school | 0.63 | 0.21 | 0.003 | 0.45 | 0.21 | 0.003 |
| Completed high school | 0.28 | 0.14 | 0.04 | 0.18 | 0.14 | 0.04 |
| Some college | 0.14 | 0.12 | 0.25 | 0.10 | 0.12 | 0.25 |
| Completed college | 0.08 | 0.12 | 0.57 | −0.01 | 0.14 | 0.96 |
| Externalizing Behavior Problems |  |  |  |  |  |  |
| Borderline clinical range | 1.71 | 0.25 | <0.001 | 1.75 | 0.51 | 0.001 |
| Clinical range | 1.96 | 0.40 | <0.001 | 2.46 | 0.63 | <0.001 |
| Internalizing Behavior Problems |  |  |  |  |  |  |
| Borderline clinical range | −0.27 | 0.17 | 0.12 | −0.17 | 0.23 | 0.47 |
| Clinical range | −0.15 | 0.17 | 0.38 | −0.20 | 0.17 | 0.25 |
| Prospective Self |  |  |  |  |  |  |
| Externalizing Behavior*Internalizing Behavior |  |  |  |  |  |  |
| Borderline clinical range* Borderline clinical range | −1.42 | 0.52 | 0.007 | −1.41 | 0.83 | 0.09 |
| Borderline clinical range*Clinical Range | −0.18 | 0.43 | 0.68 | −0.01 | 0.75 | 0.99 |
| Clinical range* Borderline clinical range | 2.10 | 0.60 | <0.001 | 1.30 | 0.87 | 0.14 |
| Clinical range*Clinical range | −0.46 | 0.54 | 0.40 | −0.55 | 0.96 | 0.56 |

ASEBA Youth Self-Report Survey

Ref = reference category
